# Supplementary material for: Scope of sulfur dioxide incorporation into alkyldiallylamine–maleic acid–SO2 tercyclopolymer
Source: Royal Society of Chemistry journal article supplement (doi:10.1039/c8ra08723g), 2018-01-01
Supplement: c8ra08723g1.pdf [file c8ra08723g1.pdf]

## SUPPORTING INFORMATION

The basic centers in PA **13** ( $\text{ZH}_2^{\pm-}$ ) (0.31-0.53 mmol repeating unit) in water (200  $\text{cm}^3$ ) were titrated by stepwise addition of 0.05–0.15 mL of  $\approx 0.1$  M NaOH or HCl (Table S1). Log  $K_i$ s were calculated using the Henderson–Hasselbalch equation (eqn (2) in Scheme 3).

**Table S1** Protonation of polymer **13** ( $\text{ZH}_2^{\pm}$ ) at 23 °C.

| run                                                                                                                                             | $\text{ZH}_2^{\pm}$<br>(mmol)  | $C_T^a$<br>(mol $\text{dm}^{-3}$ ) | $\alpha$ -range | pH-range   | Points <sup>b</sup> | Log $K_i^{o,c}$ | $n_i^c$  | $R^2,^d$ |
|-------------------------------------------------------------------------------------------------------------------------------------------------|--------------------------------|------------------------------------|-----------------|------------|---------------------|-----------------|----------|----------|
| 1                                                                                                                                               | 0.3080 ( $\text{ZH}_2^{\pm}$ ) | +0.1222                            | 0.13-0.58       | 3.05-2.57  | 22                  | 2.65            | 0.47     | 0.9927   |
| 2                                                                                                                                               | 0.4400 ( $\text{ZH}_2^{\pm}$ ) | +0.1222                            | 0.064-0.65      | 3.15-2.51  | 25                  | 2.63            | 0.45     | 0.9895   |
| 3                                                                                                                                               | 0.5280 ( $\text{ZH}_2^{\pm}$ ) | +0.1222                            | 0.087-0.65      | 3.13-2.47  | 26                  | 2.59            | 0.52     | 0.9939   |
| Average                                                                                                                                         |                                |                                    |                 |            |                     | 2.62 (3)        | 0.48 (4) |          |
| Log $K_3^e = 2.62 - 0.52 \log [(1-\alpha)/\alpha]$ For the reaction: $\text{ZH}_2^{\pm} + \text{H}^+ \xrightleftharpoons{K_3} \text{ZH}_3^+$    |                                |                                    |                 |            |                     |                 |          |          |
| 1                                                                                                                                               | 0.3080 ( $\text{ZH}_2^{\pm}$ ) | -0.09594                           | 0.82-0.13       | 4.08-7.22  | 13                  | 5.63            | 2.16     | 0.9907   |
| 2                                                                                                                                               | 0.4400 ( $\text{ZH}_2^{\pm}$ ) | -0.09594                           | 0.82-0.13       | 4.01-7.45  | 18                  | 5.55            | 2.21     | 0.9978   |
| 3                                                                                                                                               | 0.5280 ( $\text{ZH}_2^{\pm}$ ) | -0.09594                           | 0.87-0.13       | 3.87-7.45  | 22                  | 5.58            | 2.20     | 0.9971   |
| Average                                                                                                                                         |                                |                                    |                 |            |                     | 5.59 (4)        | 2.19 (3) |          |
| Log $K_2^e = 5.59 + 1.19 \log [(1-\alpha)/\alpha]$ For the reaction: $\text{ZH}^{\pm-} + \text{H}^+ \xrightleftharpoons{K_2} \text{ZH}_2^{\pm}$ |                                |                                    |                 |            |                     |                 |          |          |
| 1                                                                                                                                               | 0.3080 ( $\text{ZH}_2^{\pm}$ ) | -0.09594                           | 0.89-0.27       | 9.10-10.65 | 11                  | 10.09           | 1.13     | 0.9883   |
| 2                                                                                                                                               | 0.4400 ( $\text{ZH}_2^{\pm}$ ) | -0.09594                           | 0.87-0.36       | 9.07-10.33 | 12                  | 10.08           | 1.14     | 0.9924   |
| 3                                                                                                                                               | 0.5280 ( $\text{ZH}_2^{\pm}$ ) | -0.09594                           | 0.90-0.27       | 9.05-10.63 | 08                  | 10.19           | 1.18     | 0.9945   |
| Average                                                                                                                                         |                                |                                    |                 |            |                     | 10.12 (6)       | 1.15 (3) |          |
| Log $K_1^e = 10.12 + 0.15 \log [(1-\alpha)/\alpha]$ For the reaction: $\text{Z}^= + \text{H}^+ \xrightleftharpoons{K_1} \text{ZH}^{\pm-}$       |                                |                                    |                 |            |                     |                 |          |          |

<sup>a</sup> Titrations with NaOH and HCl are described by (-)ve and (+)ve values, respectively; <sup>b</sup> Data points used; <sup>c</sup> Parentheses include the standard deviations in the last digit; <sup>d</sup>  $R$  = Correlation coefficient; <sup>e</sup>  $\log K_i = \log K_i^o + (n_i - 1) \log [(1 - \alpha)/\alpha]$ ;
